# Supplementary figures and images for: C-reactive protein dissociation contributes to choroidal neovascularization in vivo: implications for age-related macular degeneration
Source: Research Square preprint supplement (doi:10.21203/rs.3.rs-5678488/v1), 2025-01-17

**Male intact eye**

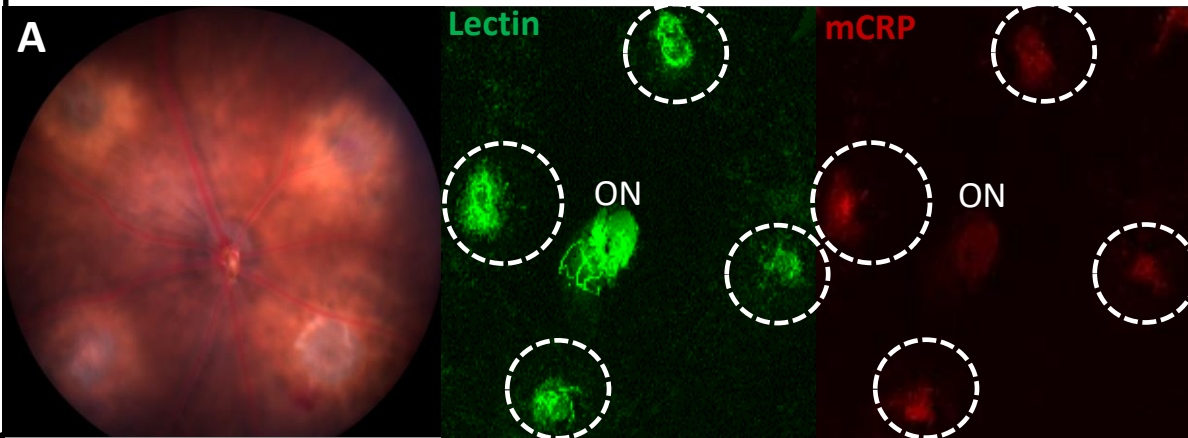

**Male vehicle injected eye**

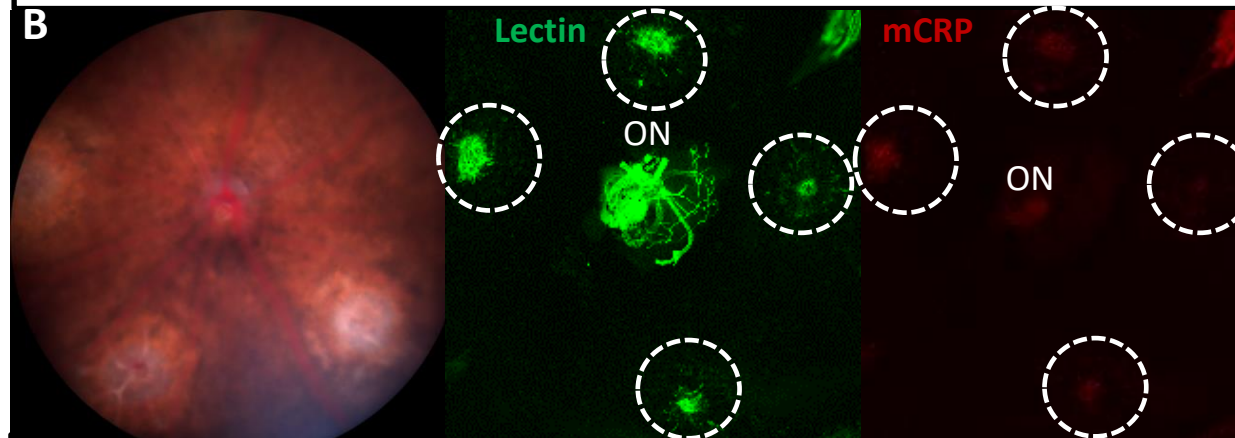

**Female intact eye**

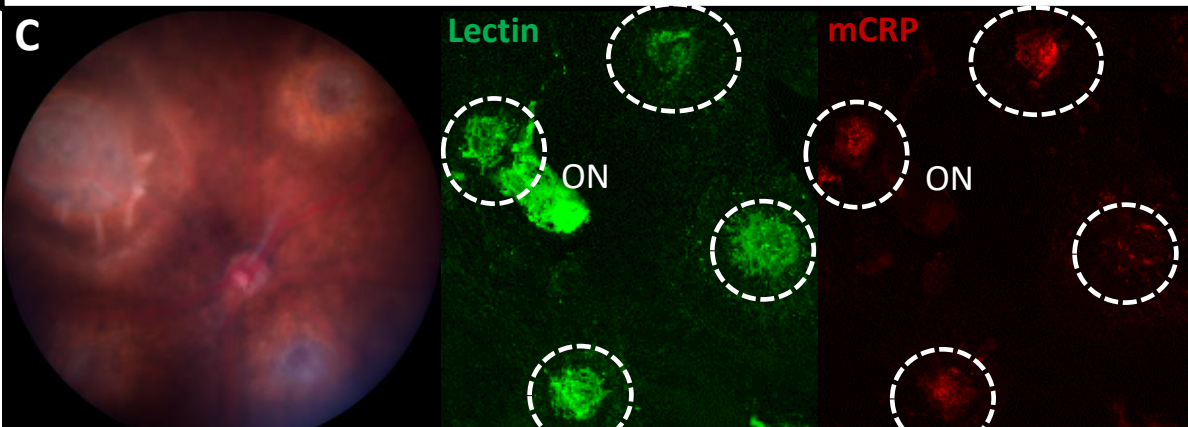

**Female vehicle injected eye**

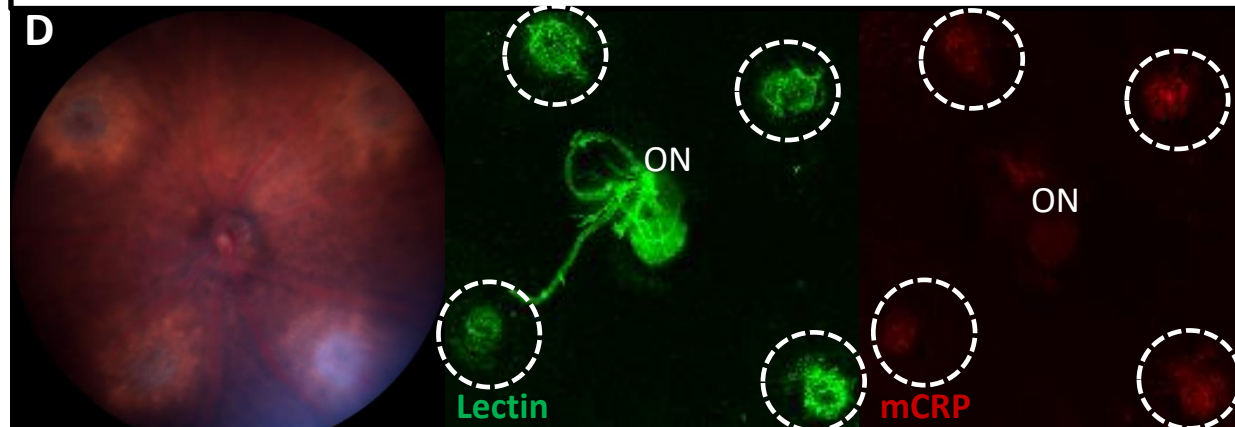

Supplement: Supplementary file 1 [file b2bab8e67f4f692413d52140.pdf]
